# Supplementary material for: IL-21 production by CD4+ effector T cells and frequency of circulating follicular helper T cells are increased in type 1 diabetes patients
Source: Springer Nature journal article supplement (doi:10.1007/s00125-015-3509-8), 2015-02-05
Supplement: MOESM2 [file 8092818]

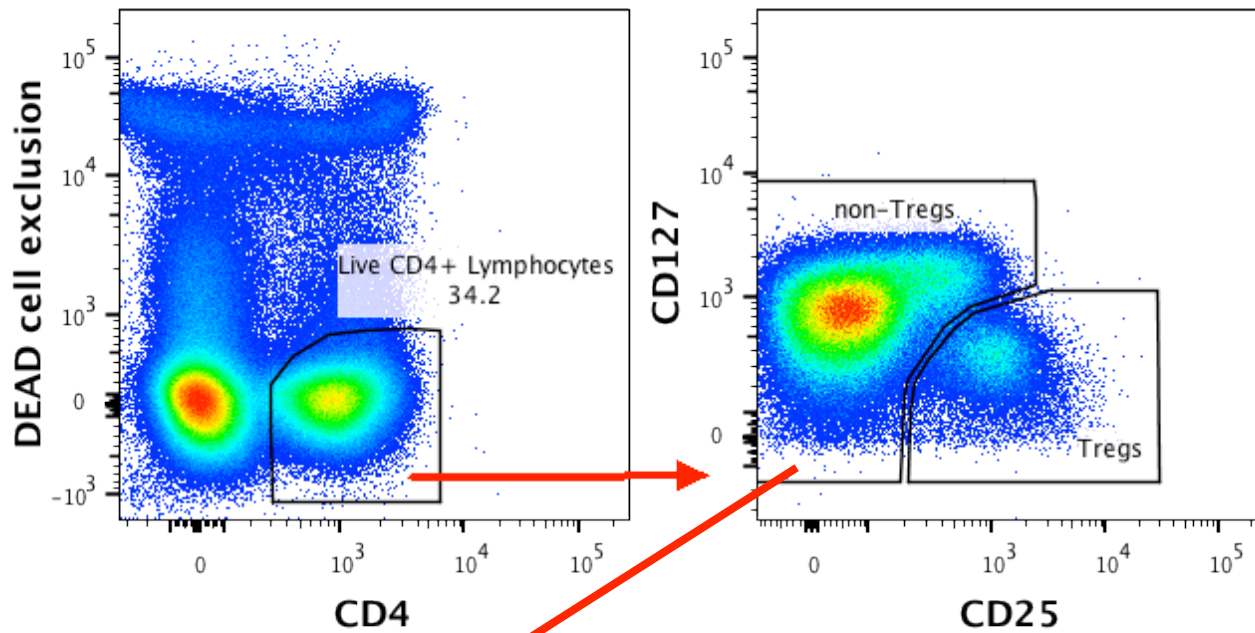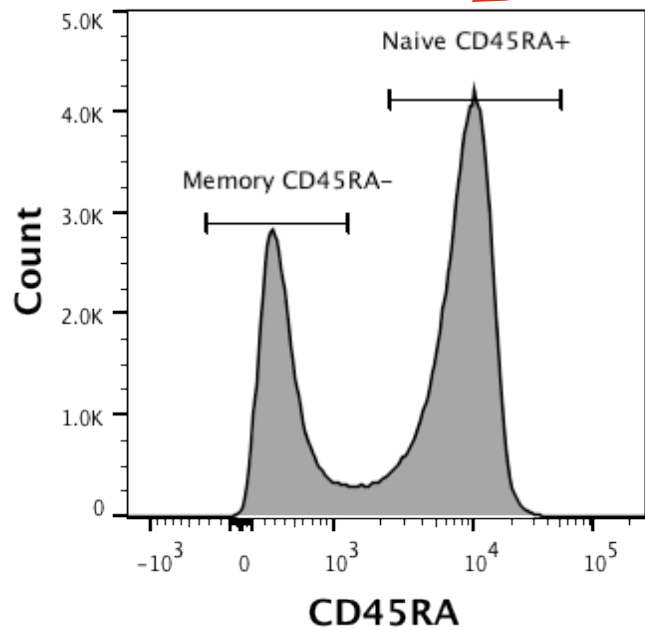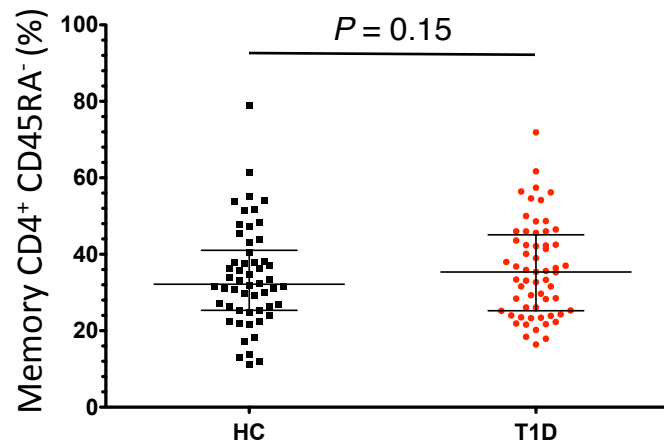

**ESM Figure 2. CD45RA<sup>-</sup> compartment is not affected in T1D patients.** Gating strategy for the delineation of the CD45RA<sup>-</sup> memory T-cell compartment in this study. Histogram depicts the distribution of CD45RA expression in one illustrative donor and the respective frequency of memory CD45RA<sup>-</sup> and naïve CD45RA<sup>+</sup> cells. Frequency of the CD45RA<sup>-</sup> memory subset (geometric mean +/- 95% CI) was compared in T1D patients (N = 62) and healthy donors (N = 54; *P* = 0.15). *P* value was calculated by linear regression of the log-transformed data, including batch as a covariate. All data were derived from PBMCs following in vitro stimulation with phorbol-12-myristate-13-acetate (PMA) and ionomycin. The initial CD4<sup>+</sup> gate (CD4 versus dead cell exclusion dye) was derived from a lymphocyte gate (defined on forward and side scatter) followed by single-cell discrimination. FACS gating plots are representative of one illustrative individual. HC, healthy control; T1D, type 1 diabetic patient.
