# Supplementary material for: IL-21 production by CD4+ effector T cells and frequency of circulating follicular helper T cells are increased in type 1 diabetes patients
Source: Springer Nature journal article supplement (doi:10.1007/s00125-015-3509-8), 2015-02-05
Supplement: MOESM3 [file 8092818]

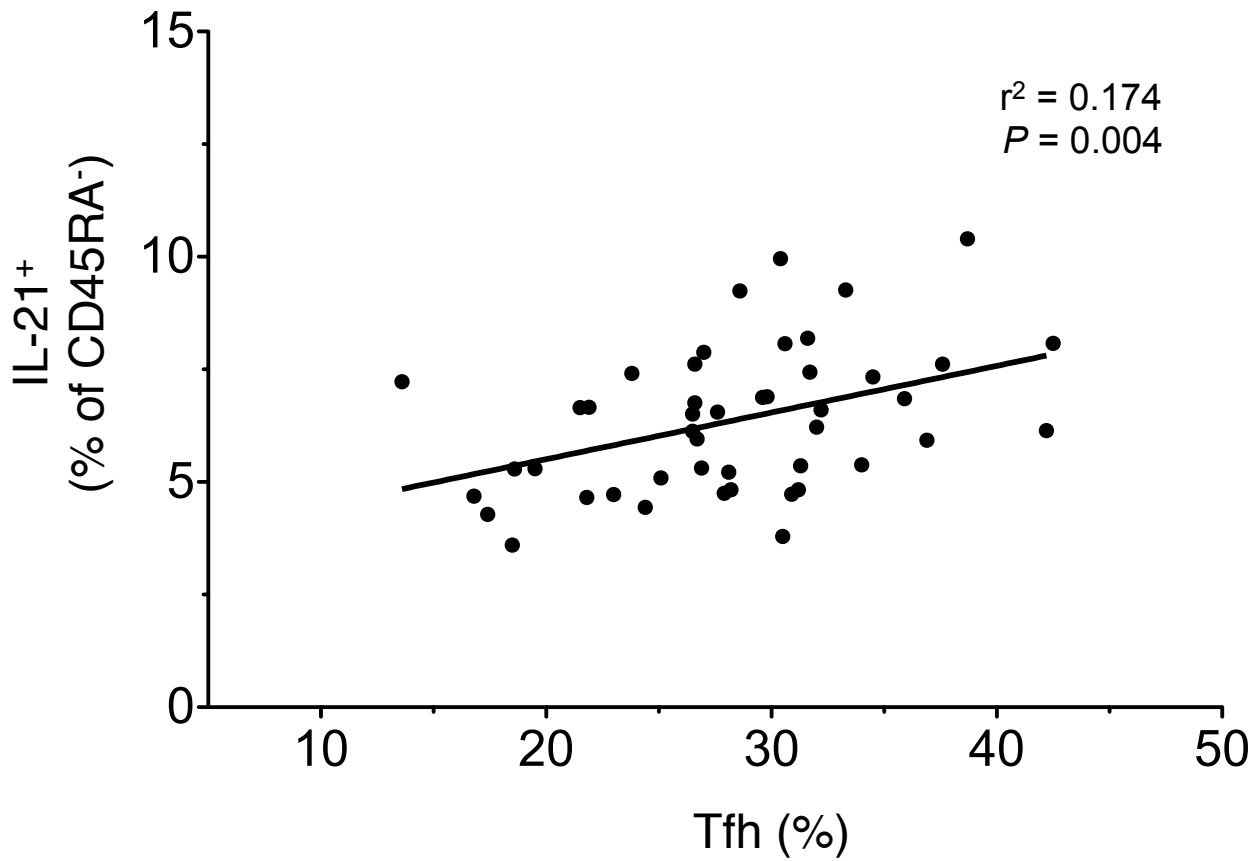

**ESM Figure 3. Frequency of IL-21<sup>+</sup> memory T cells is correlated with the frequency of circulating Tfh cells.** Frequency of IL-21<sup>+</sup> memory T cells was measured in cryopreserved PBMCs from 46 donors collected at the same visit where the frequency of circulating Tfh cells (defined as the frequency of PD-1<sup>+</sup>CCR6<sup>-</sup> cells out of CXCR5<sup>+</sup> CD45RA<sup>-</sup> CD4<sup>+</sup> T cells) was assessed in whole blood. IL-21<sup>+</sup> frequency was measured by intracellular flow cytometry following in vitro stimulation with phorbol-12-myristate-13-acetate (PMA) and ionomycin. All samples were processed in a single batch. *P* value was calculated using a linear regression analysis.
