# Supplementary material for: IL-21 production by CD4+ effector T cells and frequency of circulating follicular helper T cells are increased in type 1 diabetes patients
Source: Springer Nature journal article supplement (doi:10.1007/s00125-015-3509-8), 2015-02-05
Supplement: MOESM4 [file 8092818]

**a**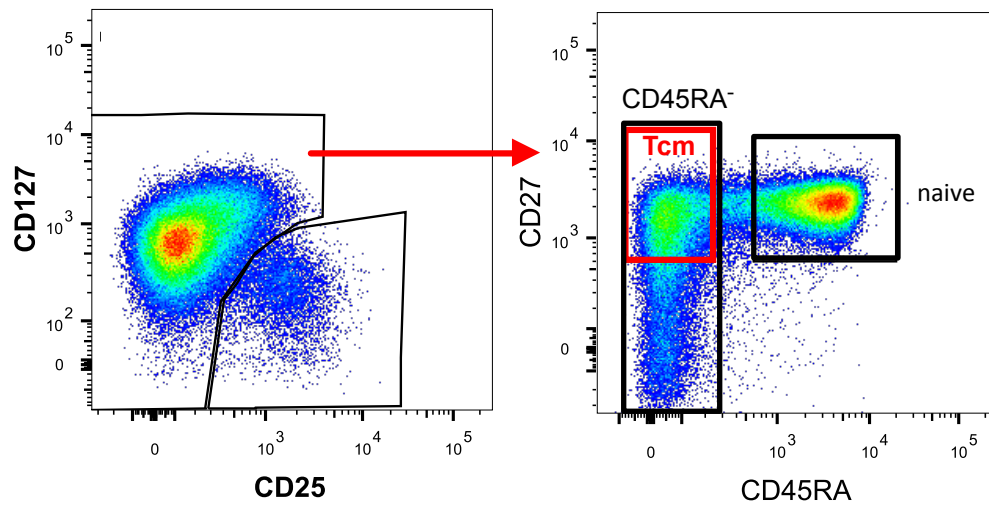**b**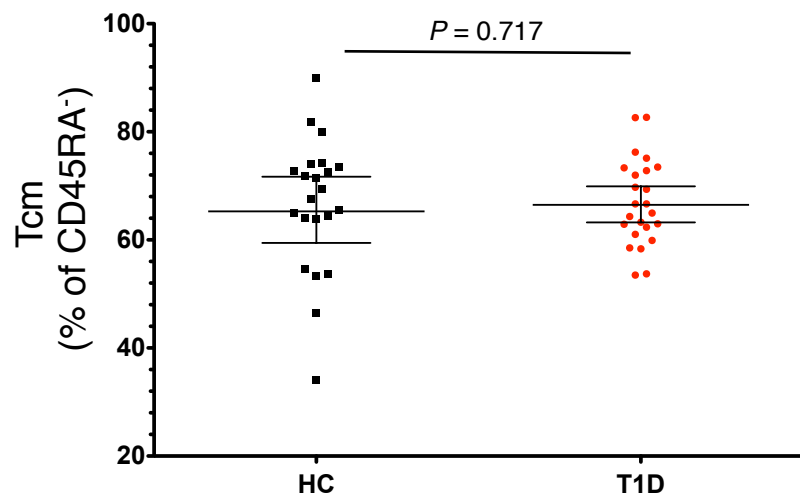**c**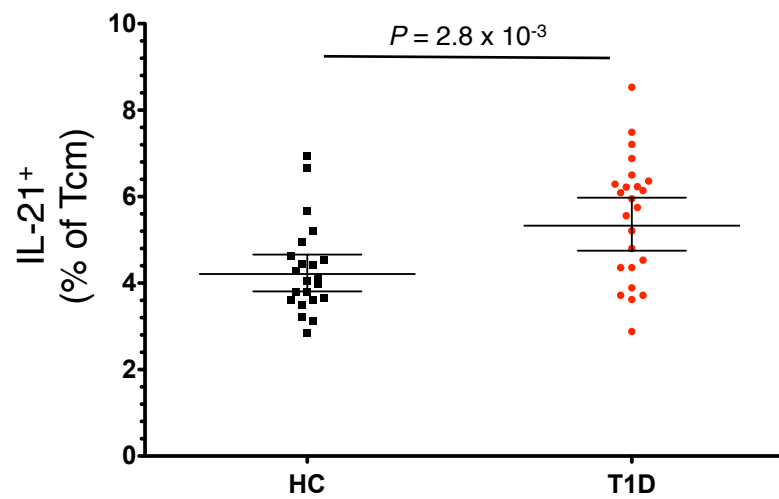

**ESM Figure 4. Frequency of the CD45RA<sup>-</sup>CD27<sup>+</sup> central memory T cell (Tcm) compartment is not altered in T1D patients.** (a) Gating strategy for the delineation of the CD27<sup>+</sup> Tcm subset out of the total CD45RA<sup>-</sup> memory T cell compartment in cryopreserved PBMCs following in vitro stimulation with PMA and ionomycin. (b) Frequency of the Tcm memory subset (geometric mean +/- 95% CI) was compared in T1D patients (N = 24) and healthy donors (N = 22). (c) Frequency of IL-21<sup>+</sup> Tcm cells (geometric mean +/- 95% CI) was compared in T1D patients (N = 24) and healthy donors (N = 22). *P* values were calculated by linear regression of the log-transformed data. HC, healthy control; T1D, type 1 diabetic patient.
